# Supplementary material
Source: PubMed Central journal article supplement (PMC6879240)
Supplement: AAC.01515-19-s0001.pdf [file AAC.01515-19-s0001.pdf]

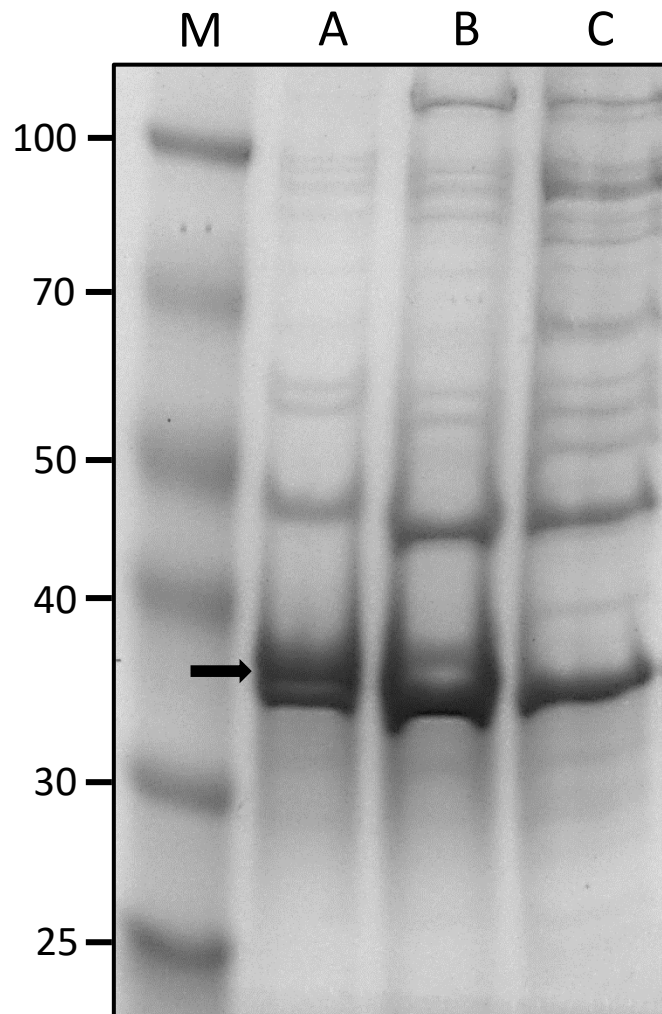

Supplementary Figure S1. SDS-PAGE analysis for OMP profiles of reference strain *K. pneumoniae* CIP53153 (lane A), *K. pneumoniae* 11978 (lane B) and *K. pneumoniae* MAS9 (lane C). Lane M, molecular size marker are indicated in kilodaltons (on the left). Black arrow indicates the position of OmpK36, that is missing in *K. pneumoniae* 11978 and *K. pneumoniae* MAS9.
